# Supplementary material for: Knowledge and Acceptance of COVID-19 Vaccination among Undergraduate Students from Central and Southern Italy
Source: MDPI journal article supplement (doi:10.3390/vaccines9060638), 2021-06-10
Supplement: s1 [file s1]

*Article*

## **Knowledge and Acceptance of COVID-19 Vaccination among Undergraduate Students from Central and Southern Italy**

### Questionnaire section regarding knowledge and opinions on COVID-19 vaccines

- The available COVID-19 vaccines contain:

*the coronavirus*

*a virus similar to coronavirus*

*the antigens of the virus (the protein “spike”)*

*the genetic information to build the antigen “spike”*

- The available COVID-19 vaccines are administered:

*in a single dose*

*in two doses*

*in two doses only for those subjects who are not immunized with the first*

- Do you think that influenza vaccination may protect against COVID-19?

*yes/no*

- Do you think that the COVID-19 vaccines are effective in preventing COVID-19 infection?

*yes/no*

- Do you think that the COVID-19 vaccines may reduce symptoms of COVID-19?

*yes/no*

- Do you think that the COVID-19 vaccines cause the disease in order to trigger immunity?

*yes/no*

- Do you think that the COVID-19 vaccines modify the DNA of vaccinated subjects?

*yes/no*

- Do you think that people vaccinated against COVID-19 can avoid other prevention measures, such as facial masks?

*yes/no*

- Do you think that all of the Italian population need to be vaccinated against COVID-19?

*yes/no*

- Do you think that only health personnel and elderly people need to be vaccinated against COVID-19?

*yes/no*

- Do you think that “herd immunity” will be reached in Italy when all health personnel and elderly people are vaccinated against COVID-19?

*yes/no*

- In your opinion, might the COVID-19 vaccines cause health problems?

*yes/no*

- In your opinion, might the COVID-19 vaccines negatively impact on individual privacy?

*yes/no*

- In your opinion, should COVID-19 vaccination be mandatory?

*yes/no*

- What are your main sources of information about COVID-19 vaccination?

*health care personnel, scientists*

*mass media (i.e., television, general interest magazines)*

*social media (i.e., Facebook, Twitter, Instagram, WhatsApp)*

*YouTube or a similar web channel*
